# Supplementary material for: Reprogramming of human fibroblasts into osteoblasts by insulin‐like growth factor‐binding protein 7
Source: PubMed Central journal article supplement — Stem Cells Transl Med. 2020 Jan 6;9(3):403–15. doi: 10.1002/sctm.19-0281 (PMC7031646; doi:10.1002/sctm.19-0281), 2020-01-06
Supplement: SCT3-9-403-s001.pdf [file SCT3-9-403-s001.pdf]

## **Supplementary Materials**

### **Materials and Methods**

#### **4 and 14 days of IGFBP7 treatment on fibroblasts for osteoblastic reprogramming**

Fibroblasts were seeded in 12-well plates with 100,000 cells/well and cultured in DMEM medium supplemented with 10 % FCS, 30 mg/ml penicillin and 100 mg/ml streptomycin overnight. When reached 80-90% confluence, cells were washed three times with PBS followed by addition of DMEM containing 2% FCS, osteogenic components and IGFBP7 (1000 ng/ml). Cells were treated with IGFBP7 for 4 days, followed by withdrawal of IGFBP7 by replenishing cells in fresh DMEM containing 2% FCS and osteogenic components. Cells were collected at day 14 and 28 days for gene expression and alizarin red staining, respectively.

#### **rhBMP-2 treatment on fibroblasts for osteoblastic reprogramming**

Fibroblasts were seeded in 12-well plates with 100,000 cells/well and cultured in DMEM medium supplemented with 10 % FCS, 30 mg/ml penicillin and 100 mg/ml streptomycin overnight. The cells at 80-90% confluence were washed three times with PBS followed by addition of DMEM containing 2% FCS, osteogenic components and rhBMP-2 (100 ng/ml, Medtronic). After 14 days of treatment, cells were collected for osteogenic gene expression analysis.

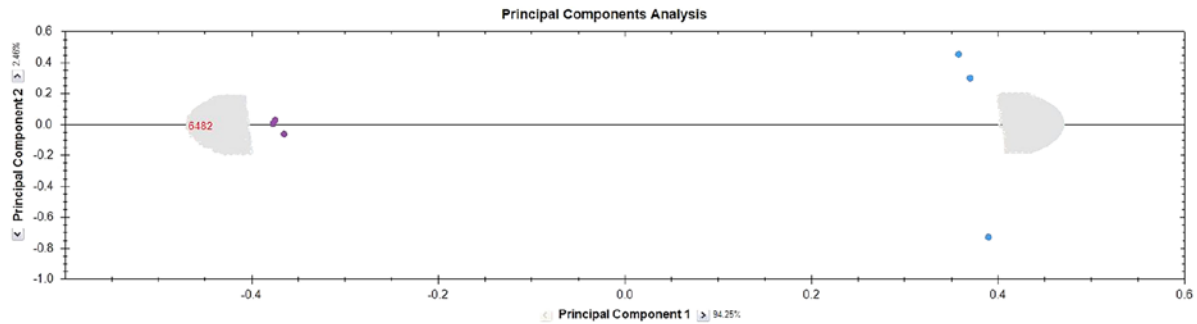

**Supplementary Figure 1** Principal component analysis was used to analyse the protein clusters in OB-CM and FB-CM. Principal component analysis identified that conditioned medium was the greatest variation in the experiment. Peptides ions with  $p$ -value  $\leq 0.05$  formed two distinct clusters corresponding to fibroblast or osteoblast medium which were 94.25% different, while variation between replicates was 2.46%. Data were replicated in two independent experiments.

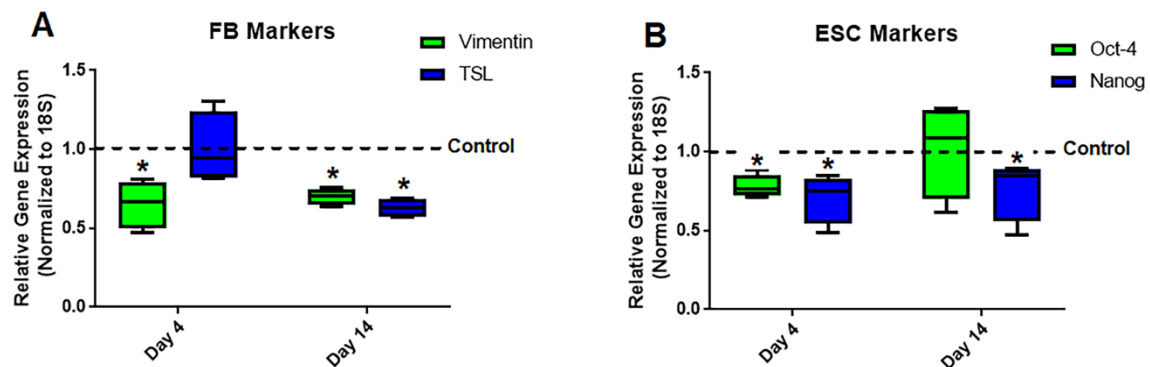

**Supplementary Figure 2** IGFBP7 treatment of fibroblasts led to down-regulation of fibroblastic and embryonic stem cell markers. The gene expression levels of vimentin and thymic stromal lymphopoietin (TSL) (A), as well as Oct-4 and Nanog (B) were significantly lower in rOBs induced by IGFBP7 than those in untreated fibroblasts at day 4 and day 14. \* indicates  $p \leq 0.05$  compared to control. Mean  $\pm$  SE and 5-95% CI of four independent experiments is shown.

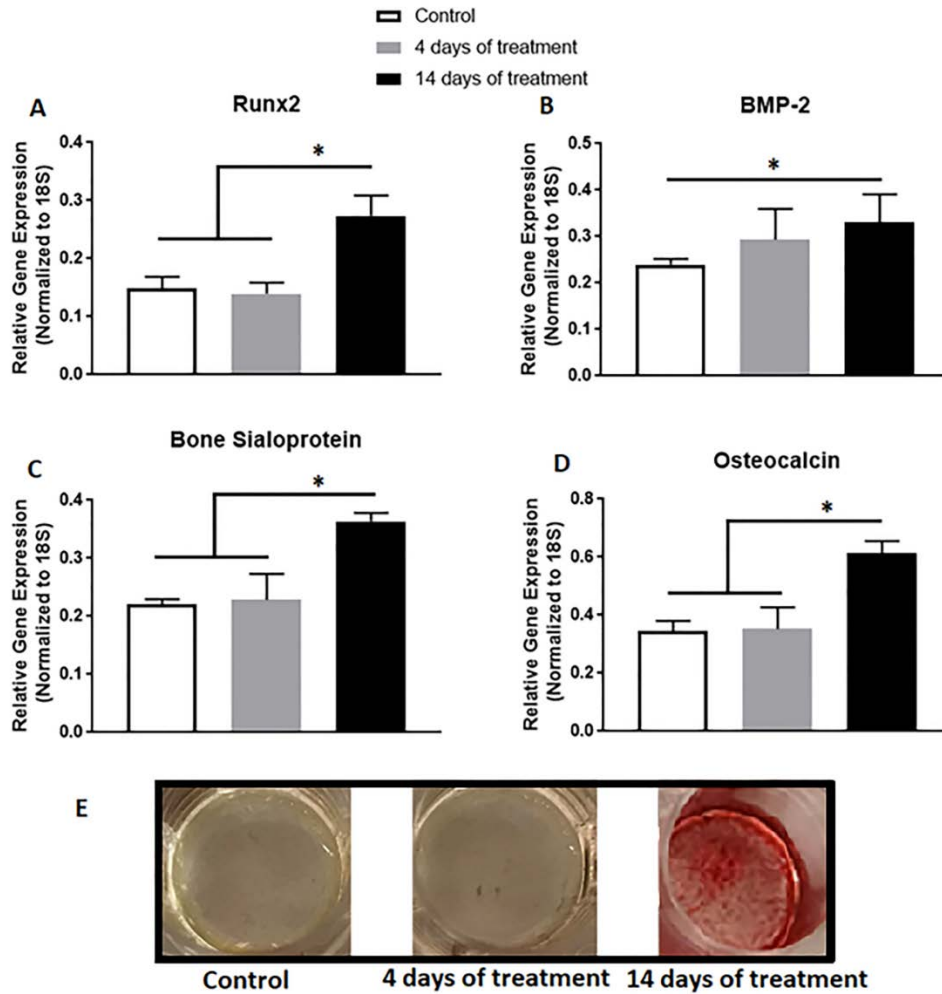

**Supplementary Figure 3 Treatment with IGFBP7 for 14 days induced sustained reprogramming of fibroblasts into osteoblasts.** Fibroblasts were treated with IGFBP7 (1  $\mu\text{g/ml}$ ) for 4 or 14 days followed by withdrawal of IGFBP7 from the culturing media till 28 days of culturing to determine whether IGFBP7-induced osteoblastic reprogramming of fibroblast is a transient or long-term effect. Osteogenic gene expression levels was quantified at day 14. Bone nodule formation was measured by Alizarin Red S staining at day 28. Compared with control, no significant change in osteogenic gene expression (A-D) or bone nodule formation was observed in fibroblasts treated for 4 days with IGFBP7 (E), while osteogenic gene expression and bone nodule formation was significantly increased in fibroblasts treated for 14 days with IGFBP7. \* indicates  $p \leq 0.05$ . Mean  $\pm$  SE of three independent experiments is shown.

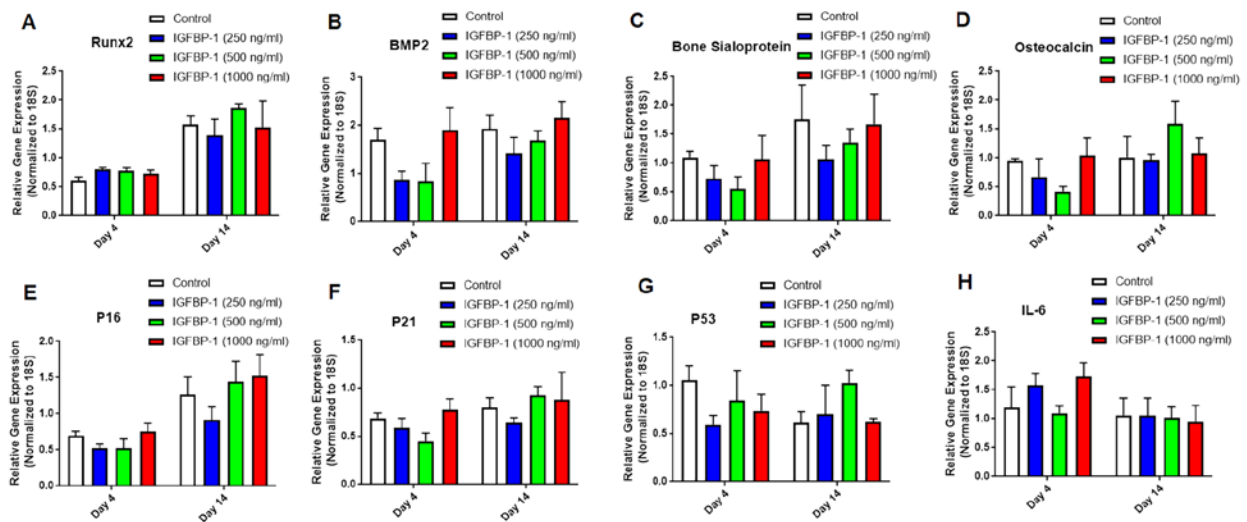

**Supplementary Figure 4 IGFBP1 did not alter gene expression level for cell senescence and osteoblastic markers in fibroblasts.** Fibroblasts were treated with 250, 500 or 1000 ng/ml IGFBP1 and osteogenic gene expression was quantified by qPCR. IGFBP1 did not alter change the gene expression levels of osteoblastic makers (A-D), or cell senescence-associated regulatory (P16, P21 and P53, E-G) and SASP (IL-6, F) genes. Mean  $\pm$  SE of four independent experiments is shown.

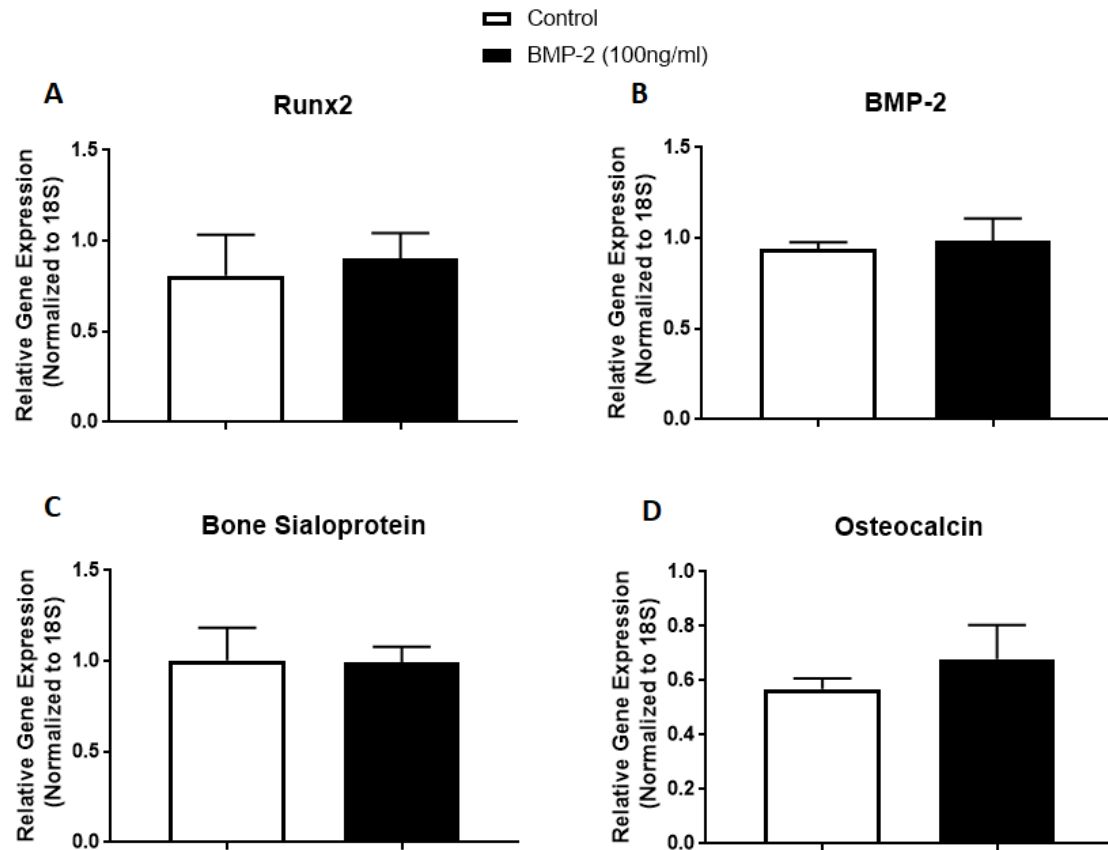

**Supplementary Figure 5 BMP-2 did not alter gene expression osteoblastic markers in fibroblasts.** Fibroblasts were treated with BMP-2 (100 ng/ml) and the osteogenic gene expression was measured by qPCR. BMP-2 treatment did not lead to elevation of osteogenic gene expression levels in fibroblasts at day 14 post treatment (A-D). Mean  $\pm$  SE of three independent experiments is shown.

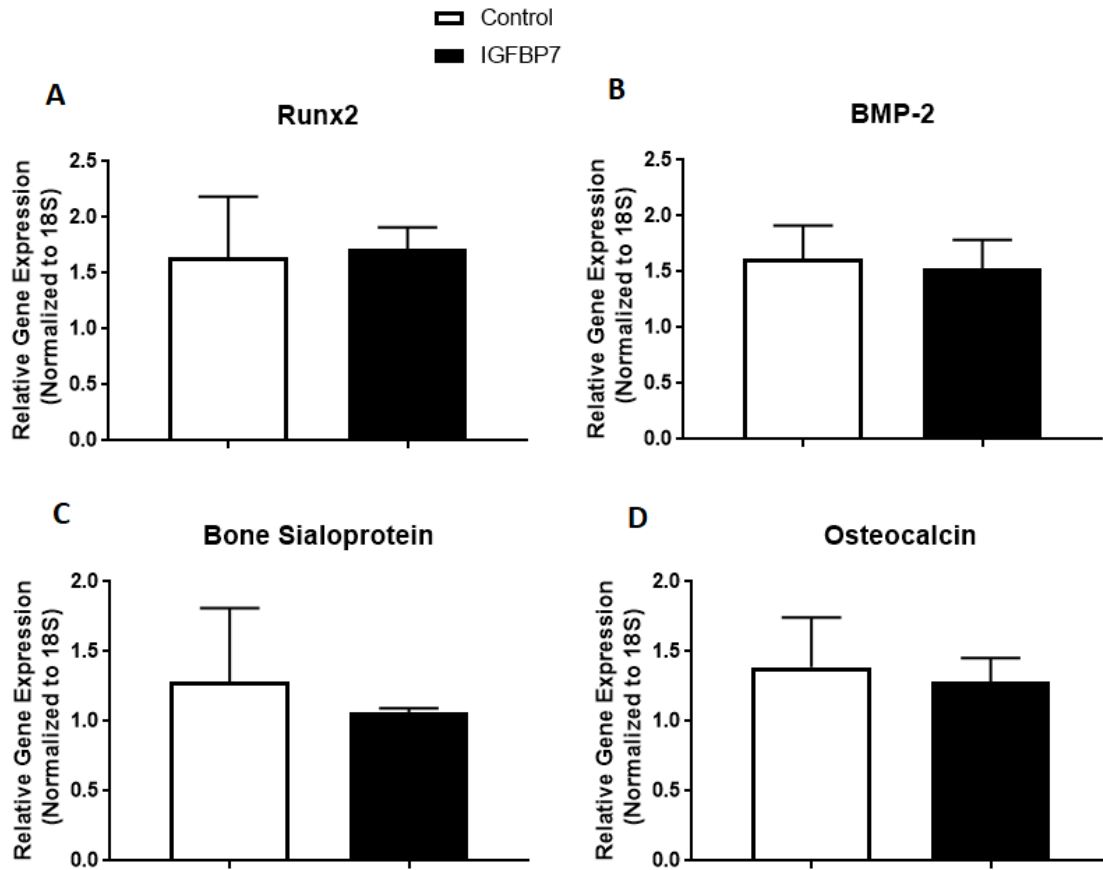

**Supplementary Figure 6 IGFBP7 did not change gene expression of osteoblastic markers in late passaged fibroblasts (P20).** Fibroblasts at passage 20 were treated with IGFBP7 (100 ng/ml) for 14 days and osteogenic gene expression levels were quantified by qPCR. No elevation of osteogenic gene expression levels was observed in late passaged fibroblasts (A-D). Mean  $\pm$  SE of three independent experiments is shown.
